# Supplementary material for: Suspension of Amorphous Calcium Phosphate Nanoparticles Impact Commitment of Human Adipose-Derived Stem Cells In Vitro
Source: MDPI journal article supplement (doi:10.3390/biology10070675), 2021-07-16
Supplement: s1 [file s1]

## Supporting Information

### **Suspension of amorphous calcium phosphate nanoparticles impact commitment of human adipose-derived stem cells *in vitro***

**Petra Wolint<sup>1</sup>, Lukas Näf<sup>1</sup>, Désirée Schibler<sup>1</sup>, Nora Hild<sup>2</sup>, Wendelin J. Stark<sup>2</sup>, Pietro Giovanoli<sup>1</sup>, Maurizio Calcagni<sup>1</sup> and Johanna Buschmann<sup>1,\*</sup>**

<sup>1</sup>Division of Plastic and Hand Surgery, University Hospital Zurich, Zurich, 8091, Switzerland

<sup>2</sup>Institute for Chemical and Bioengineering, Department of Chemistry and Applied Biosciences, ETH Zurich, Zurich, 8093, Switzerland

\*Corresponding author: johanna.buschmann@usz.ch

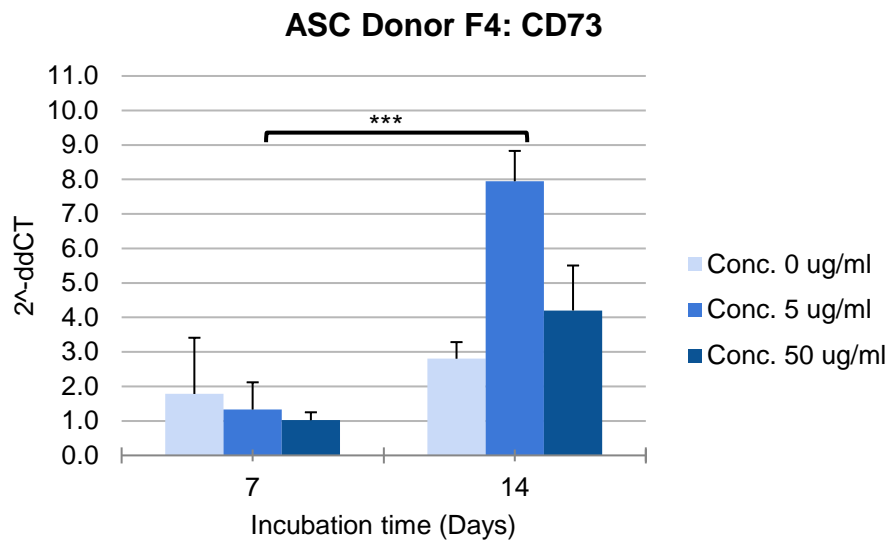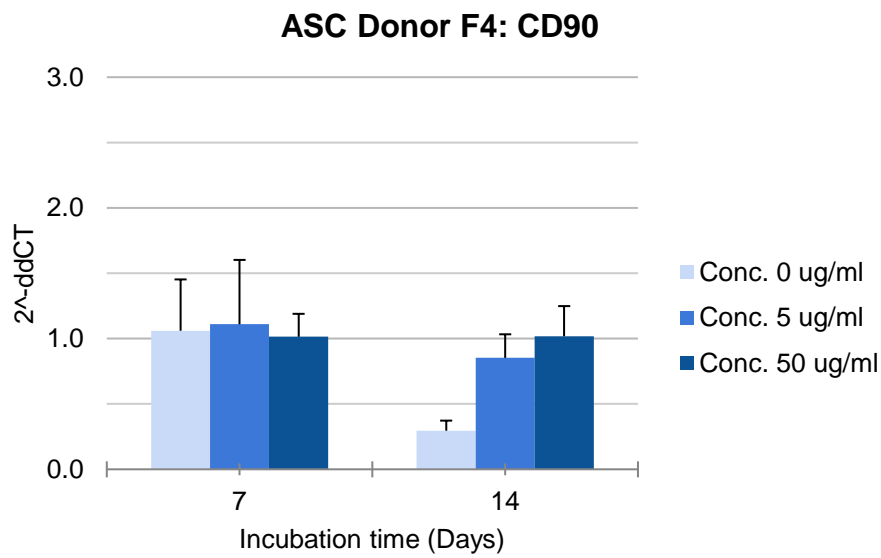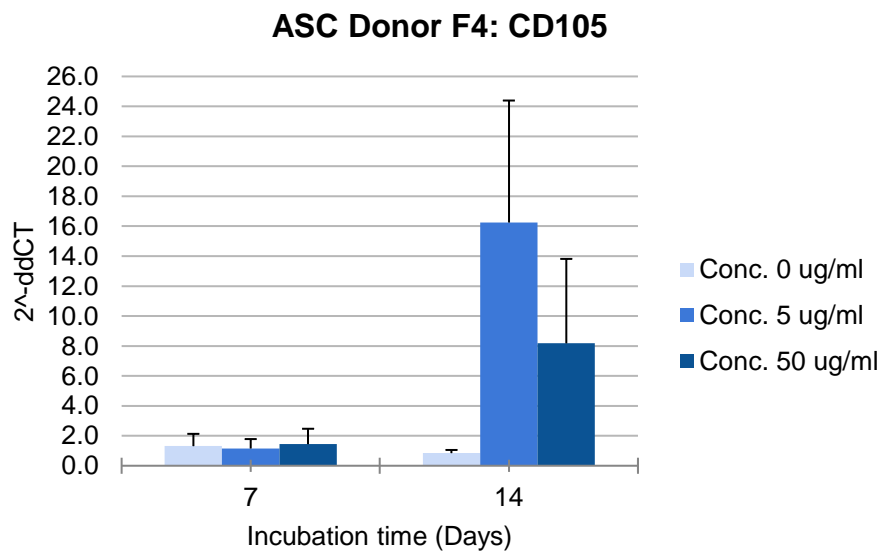

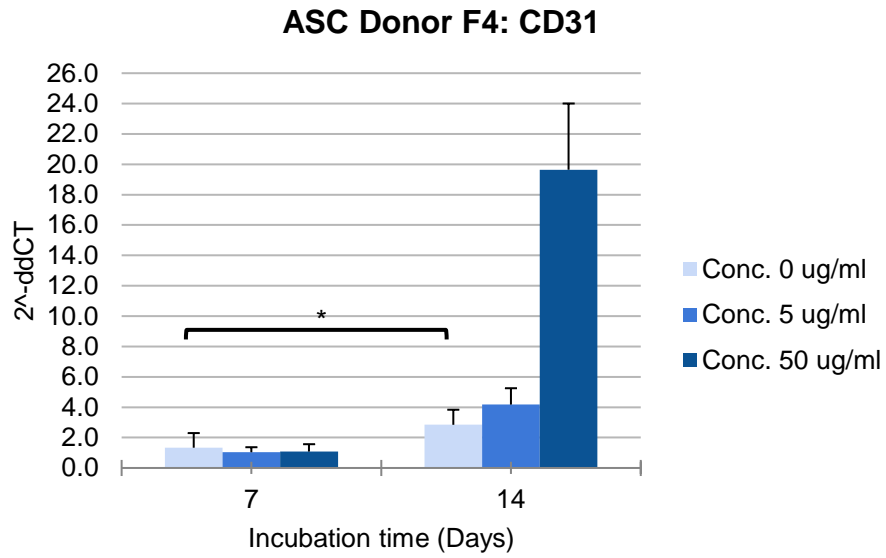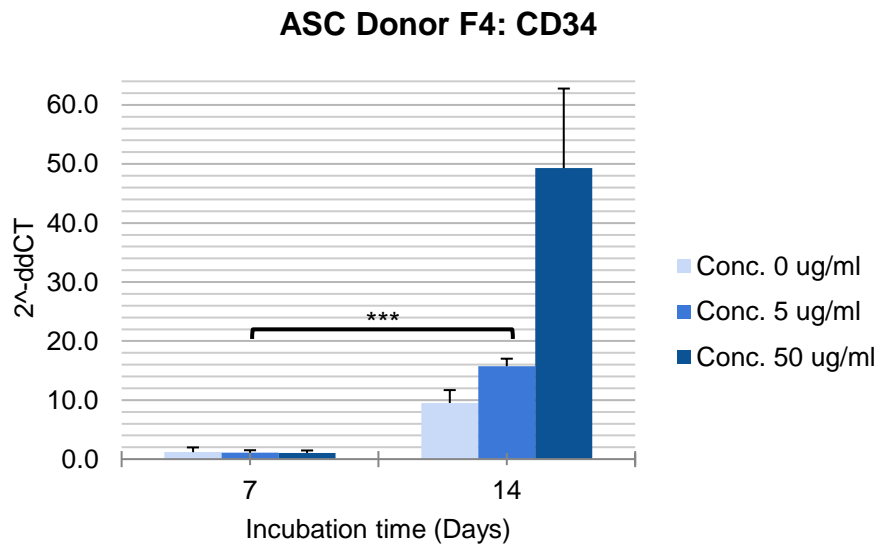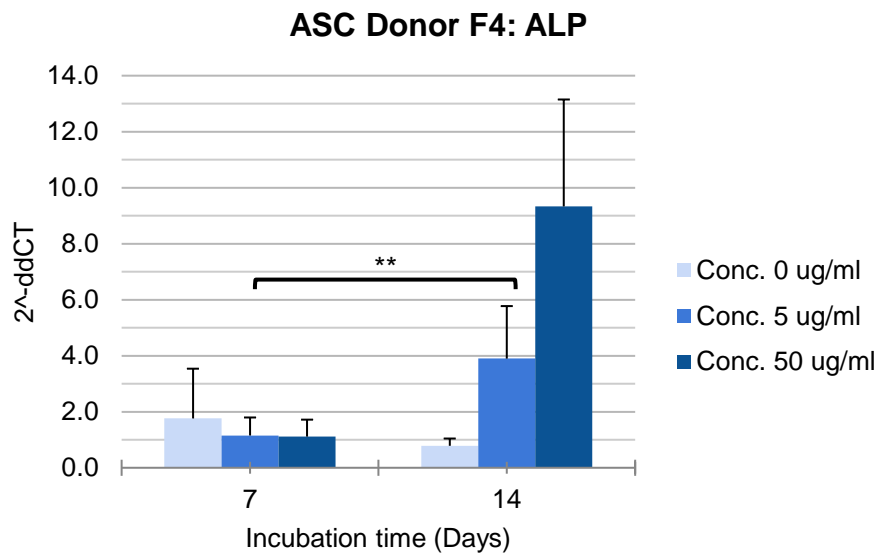

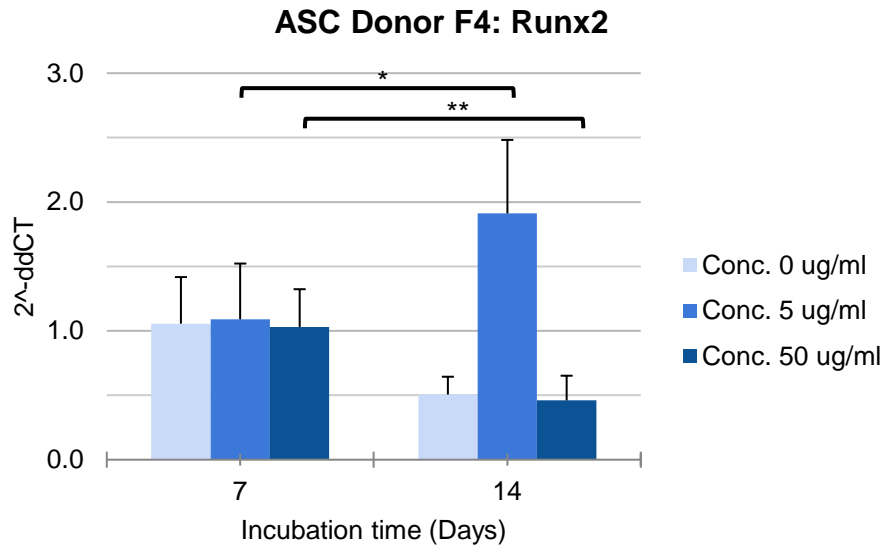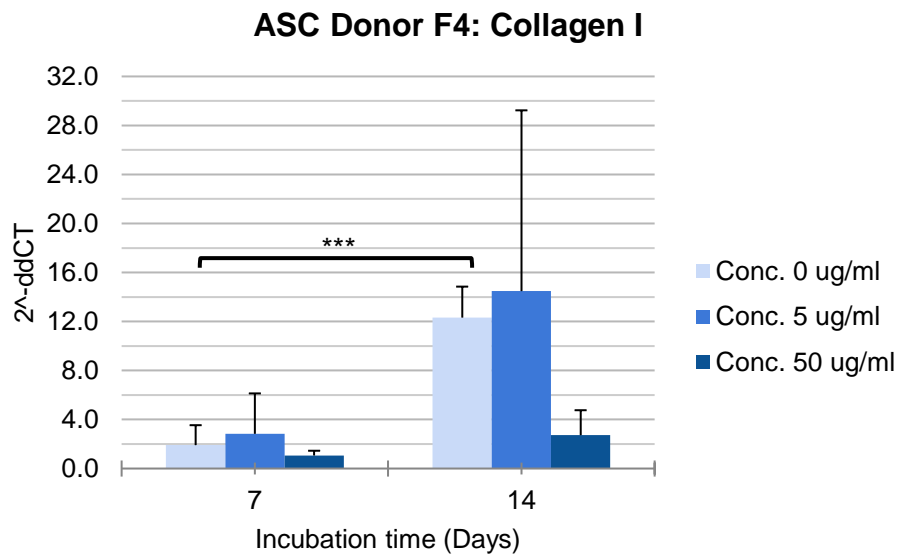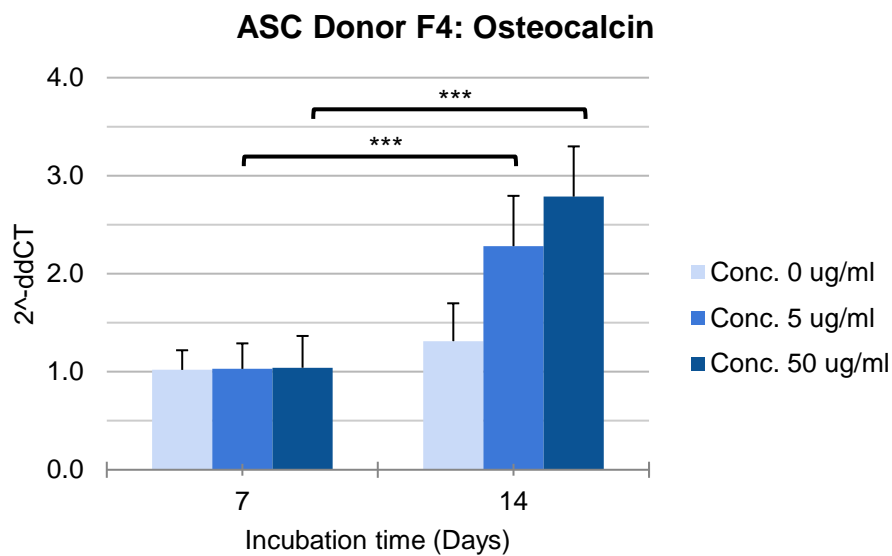

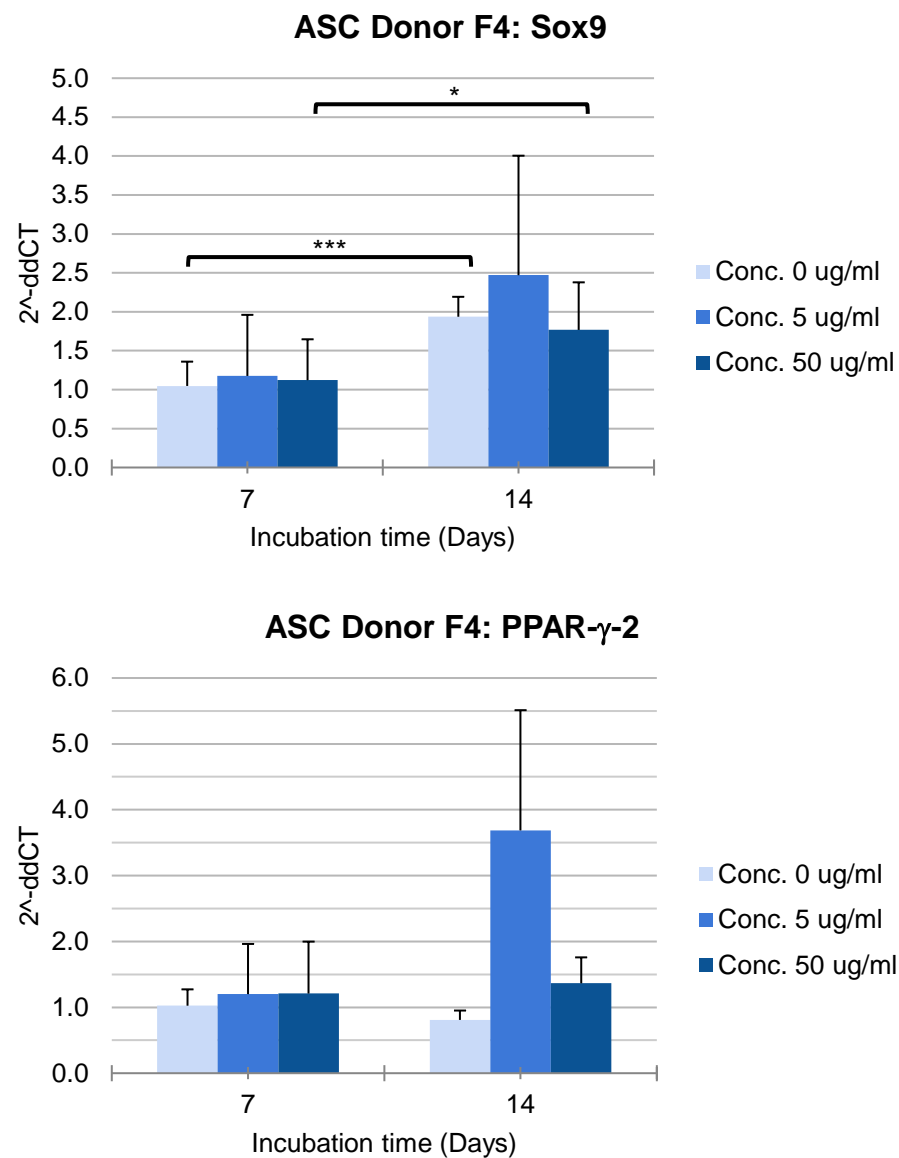

**Figure S1.** Average manifold induction of different genes for donor 1 (internal abbreviation F4). Experiments were carried out for three conditions and two time points, with 0, 5 or 50 ug/mL aCaP nanoparticles, denoted as Conc. = concentration and incubation for 7 or 14 days in culture, respectively.

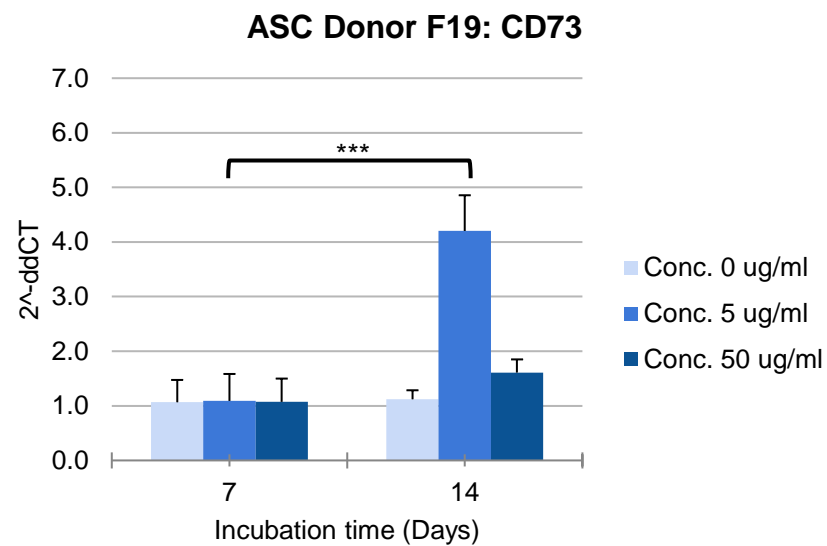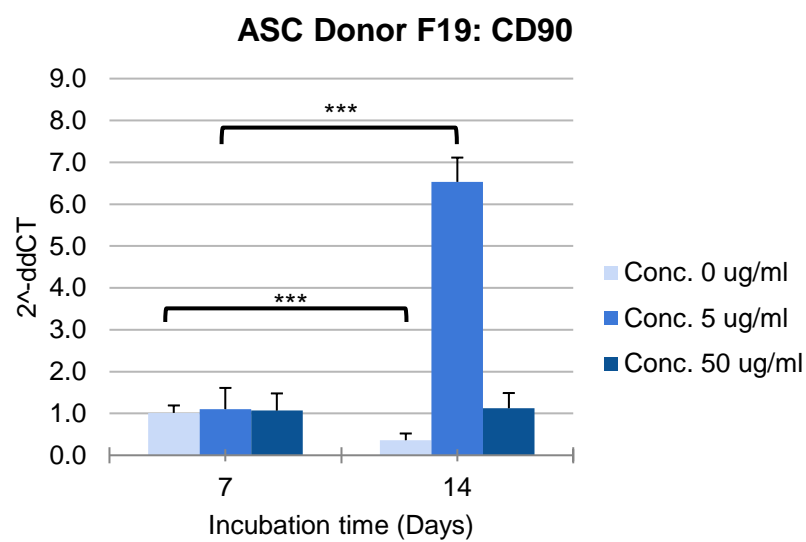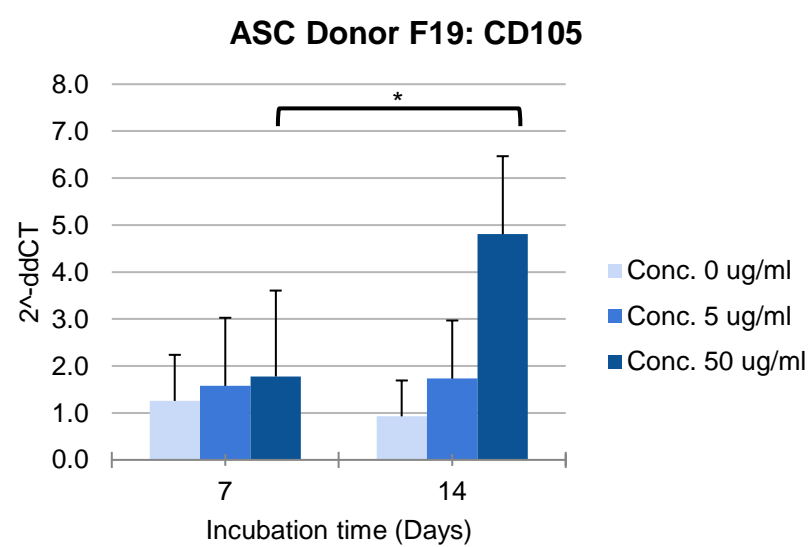

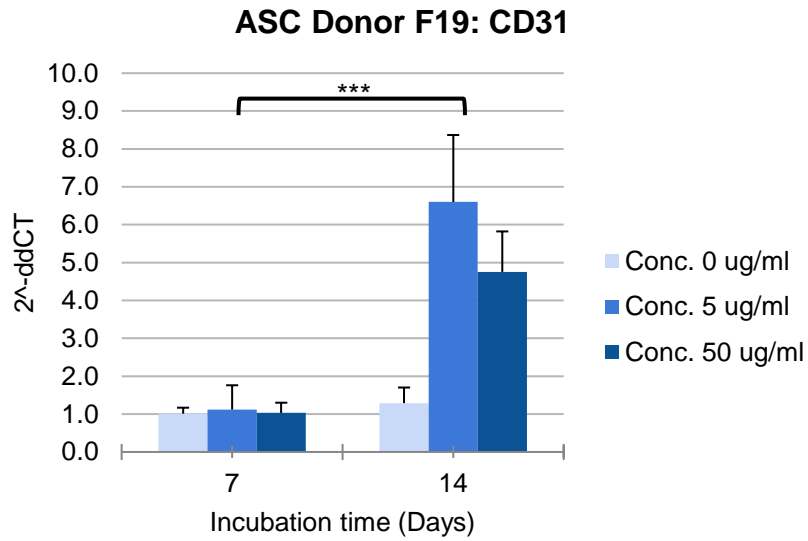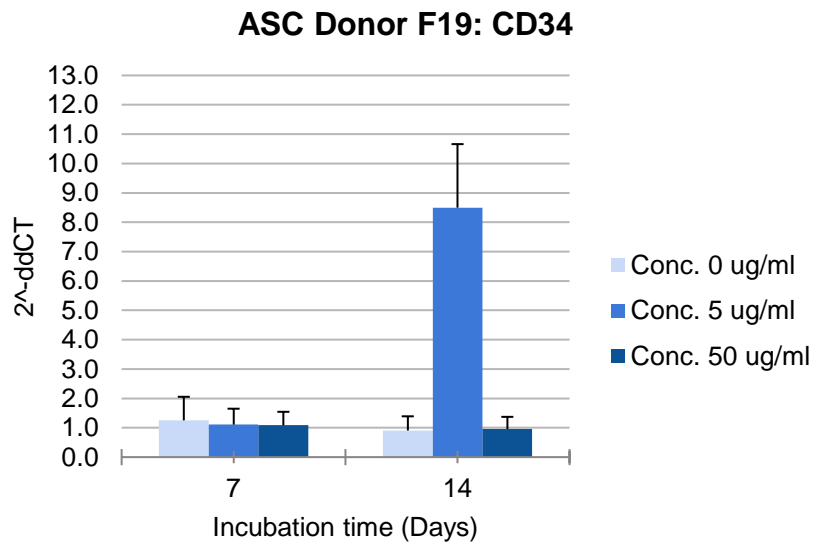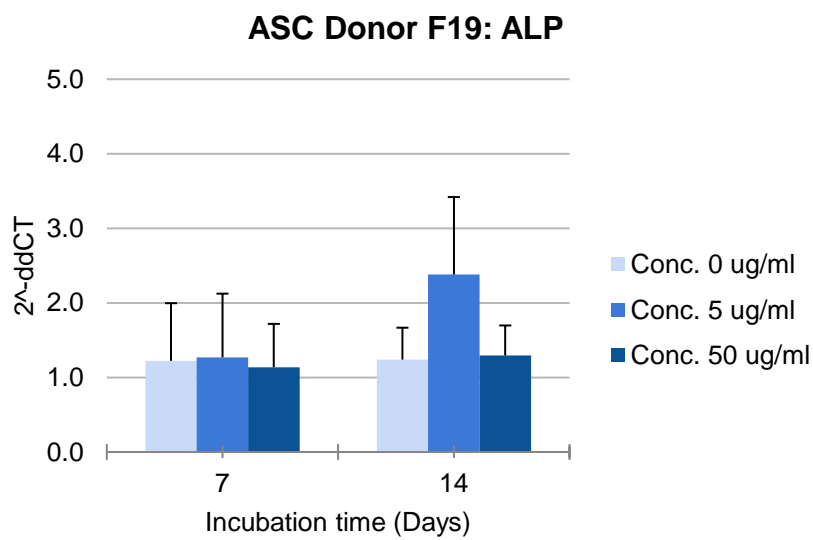

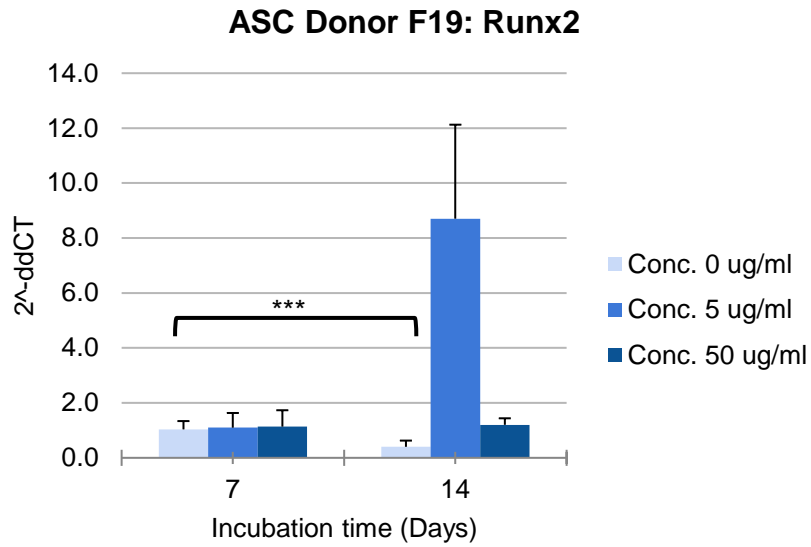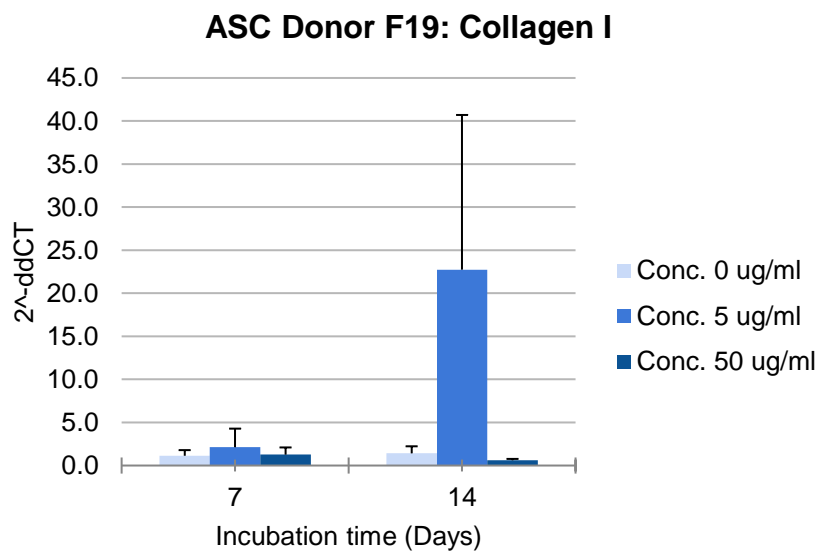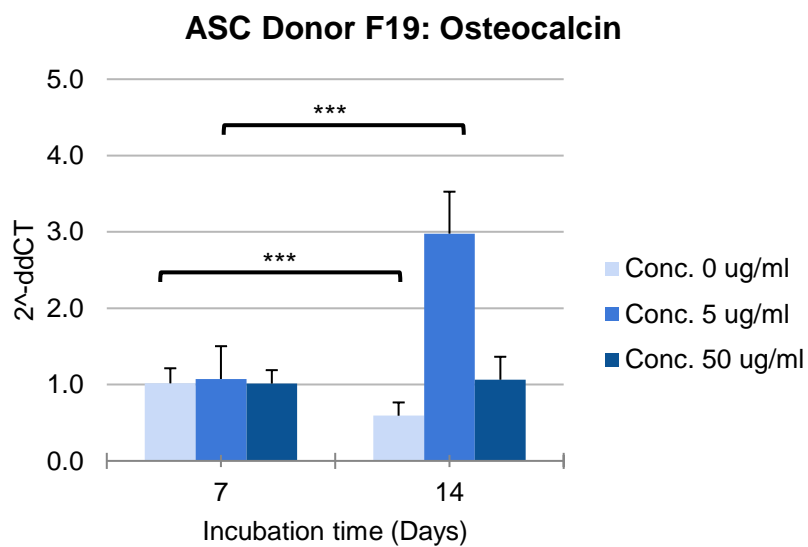



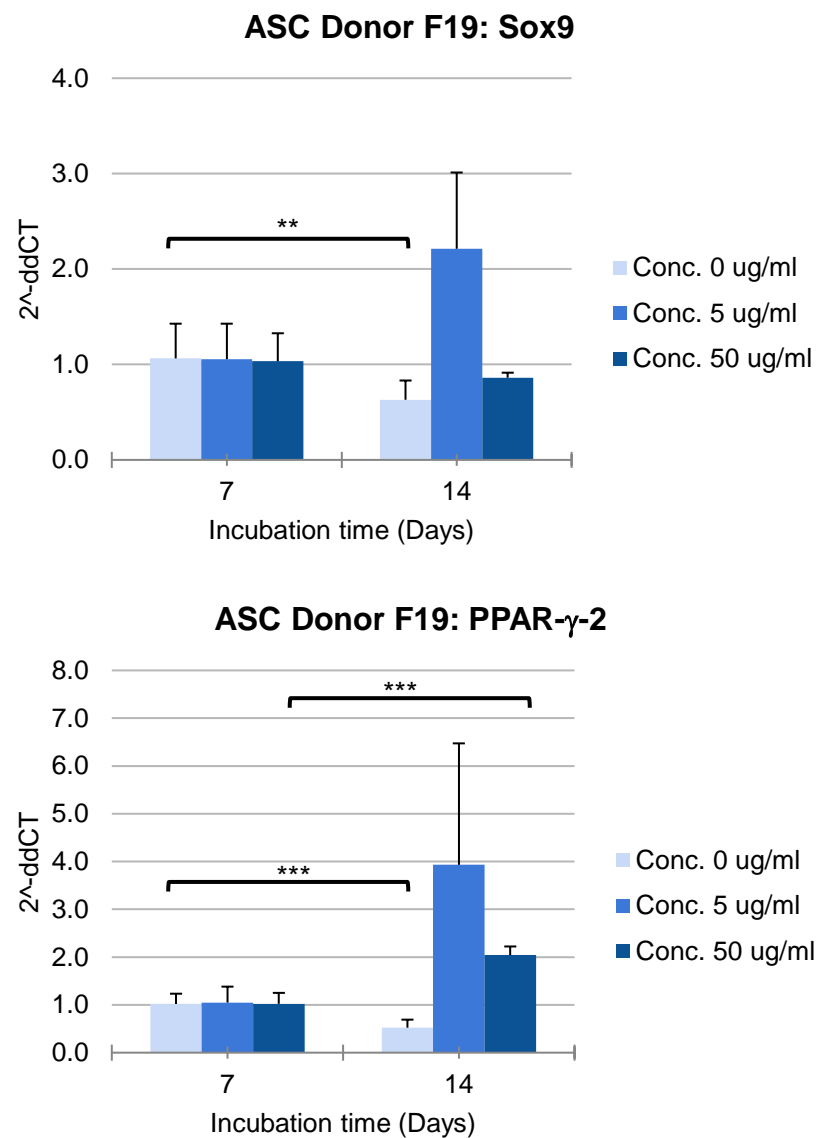

**Figure S2.** Average manifold induction of different genes for donor 2 (internal abbreviation F19). Experiments were carried out for three conditions and two time points, with 0, 5 or 50 ug/mL aCaP nanoparticles, denoted as Conc. = concentration and incubation for 7 or 14 days in culture, respectively.

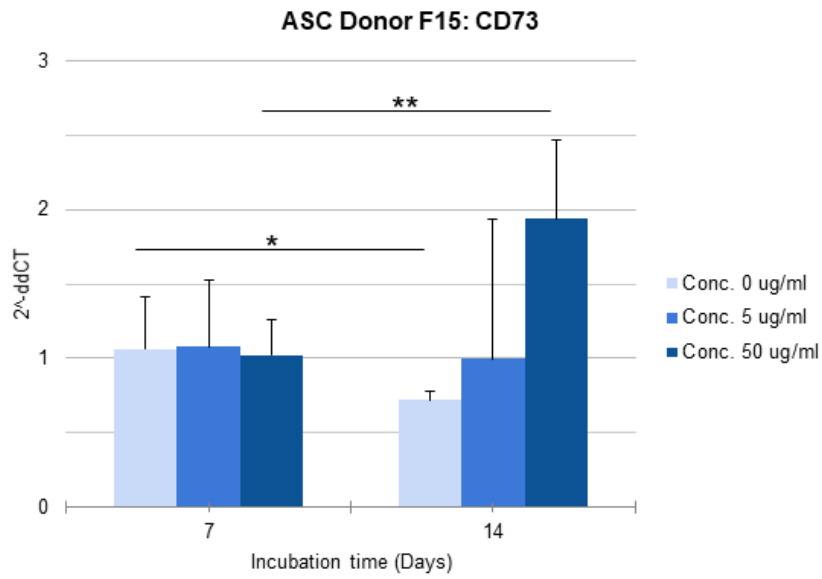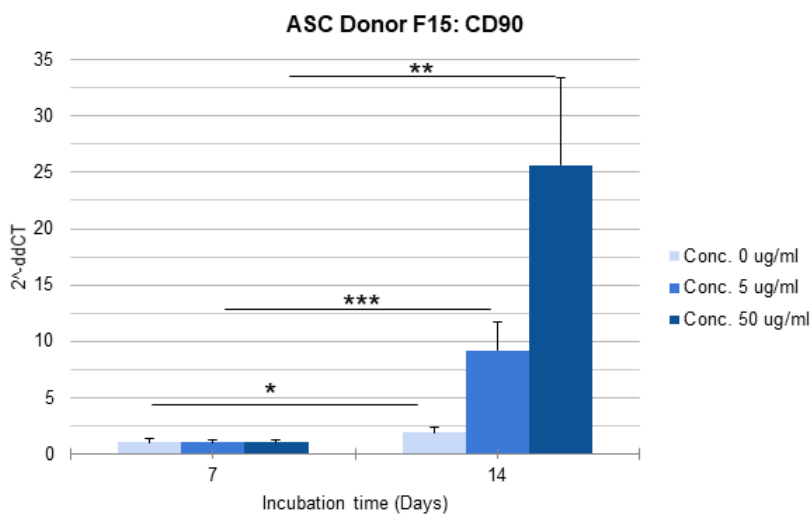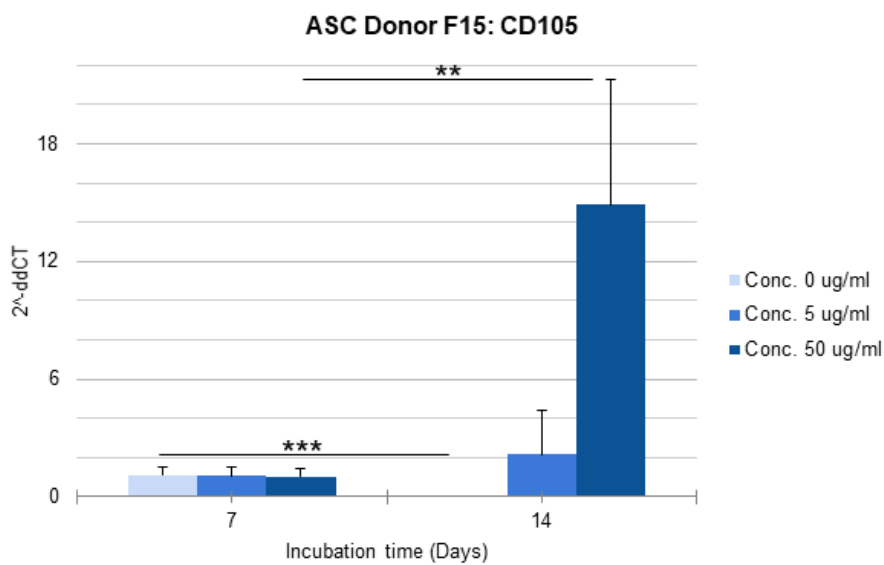

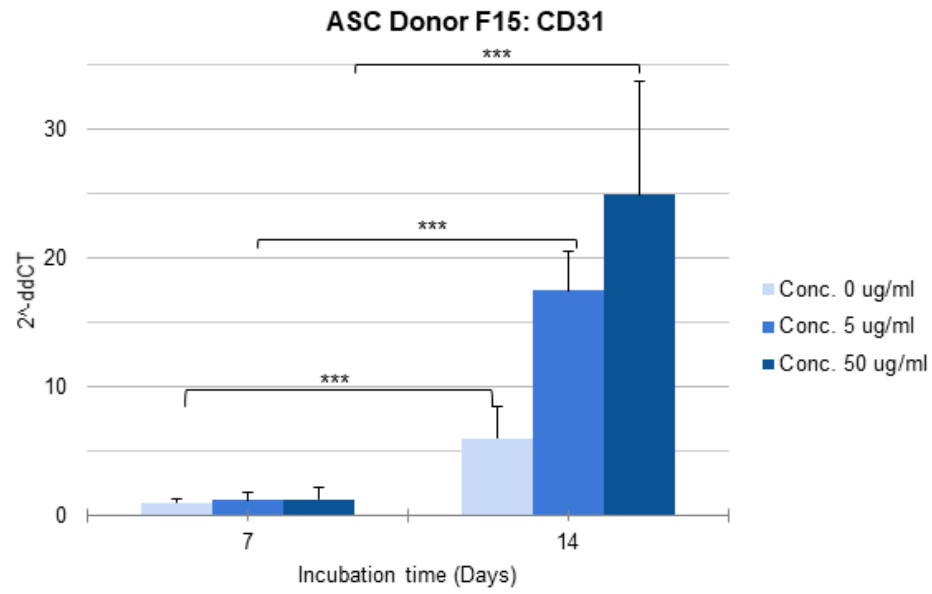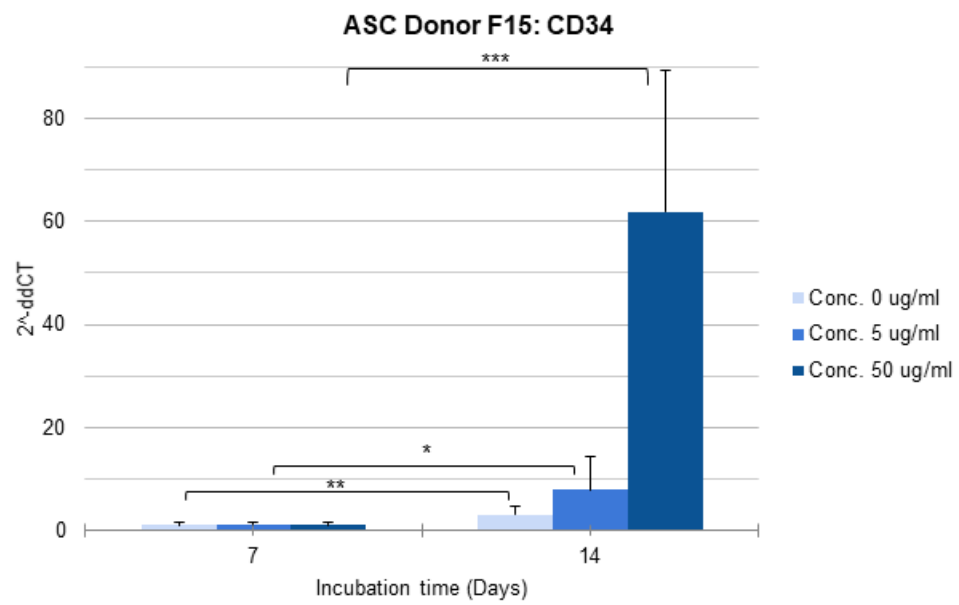

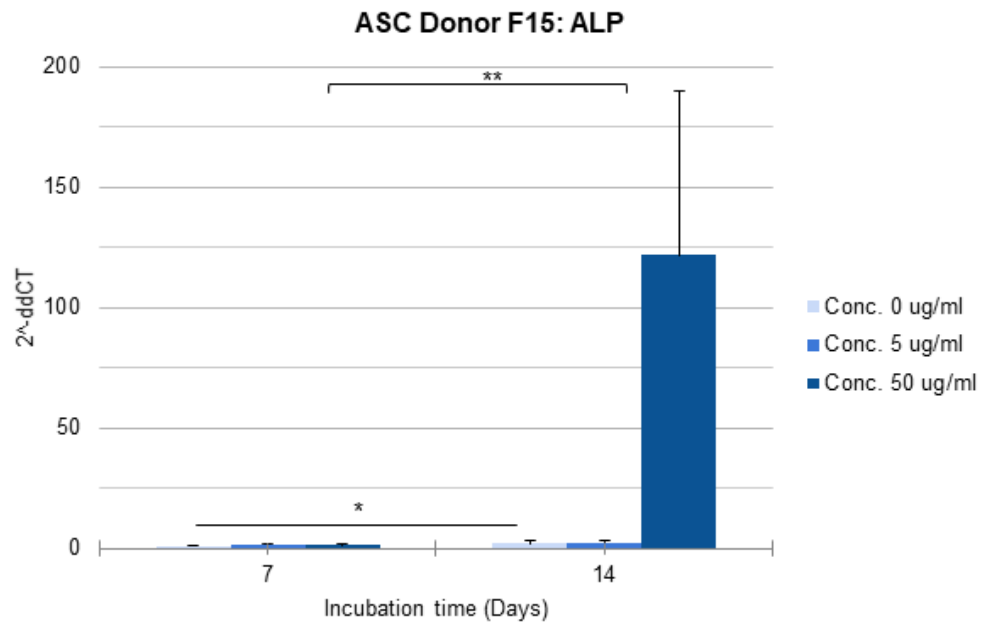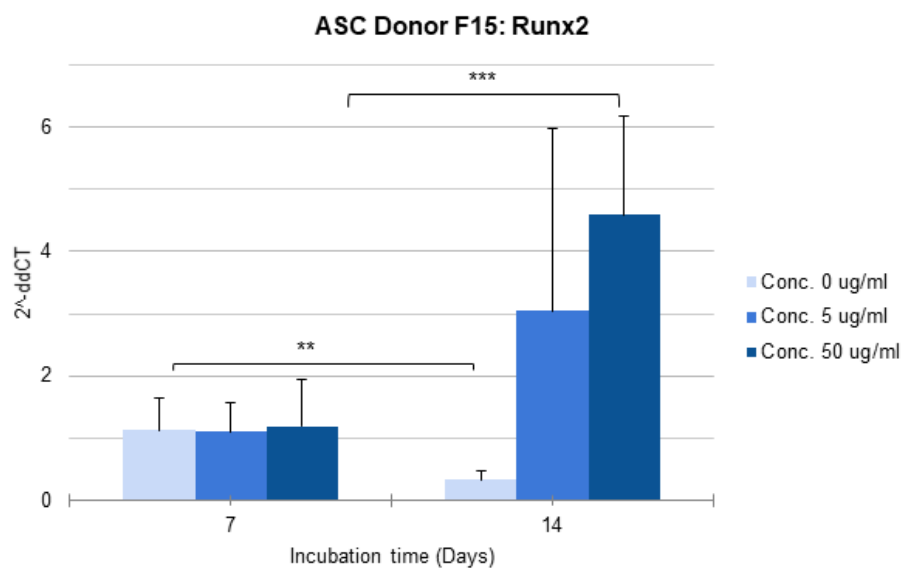

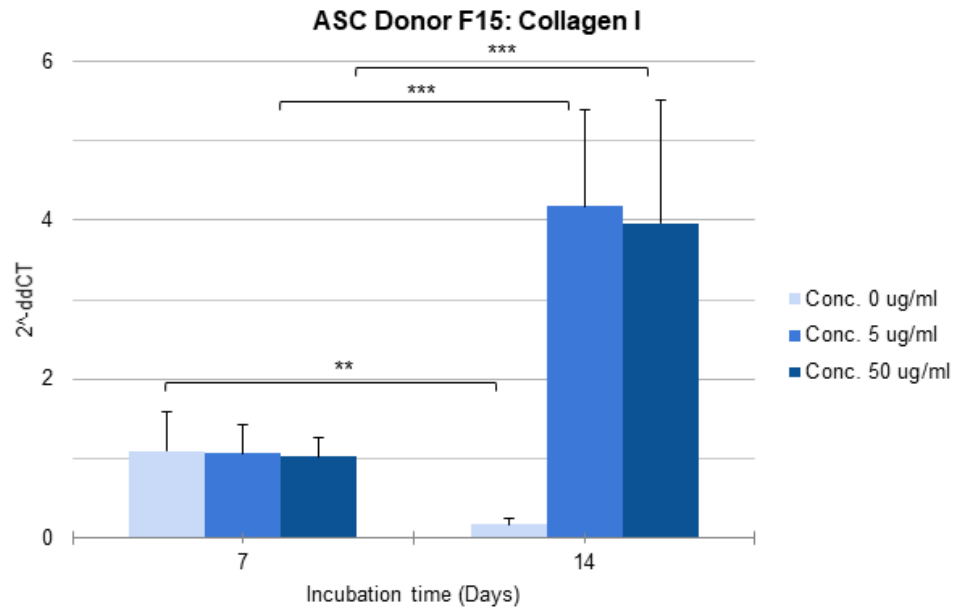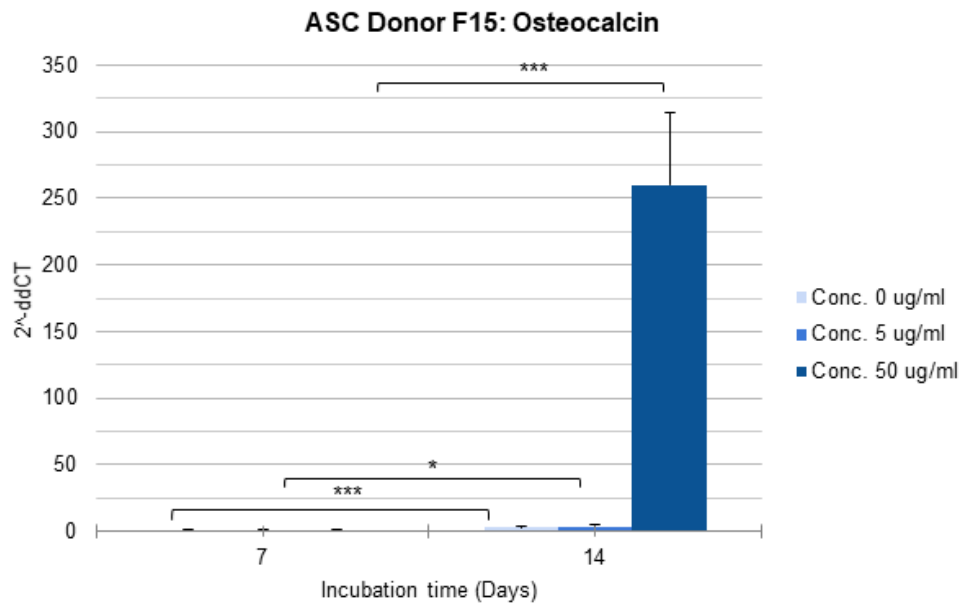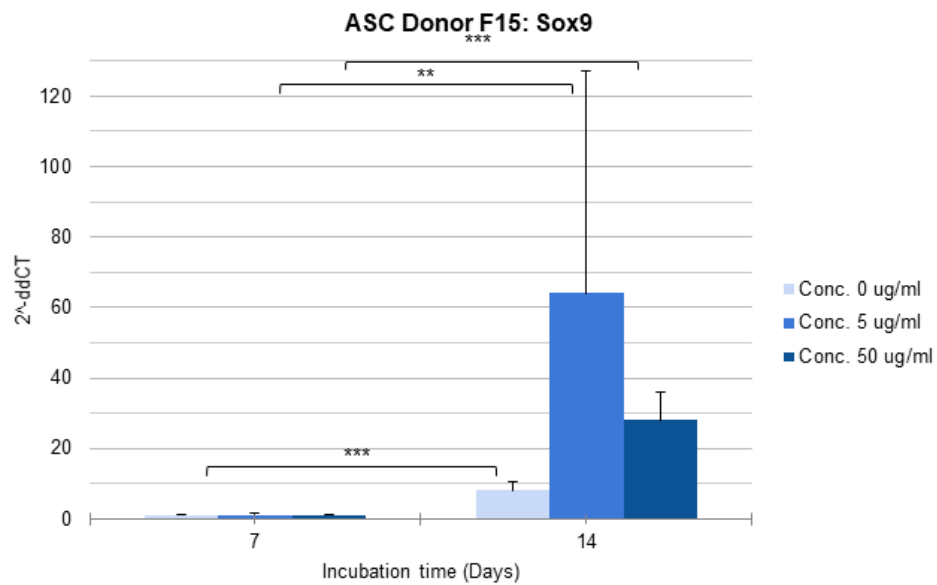

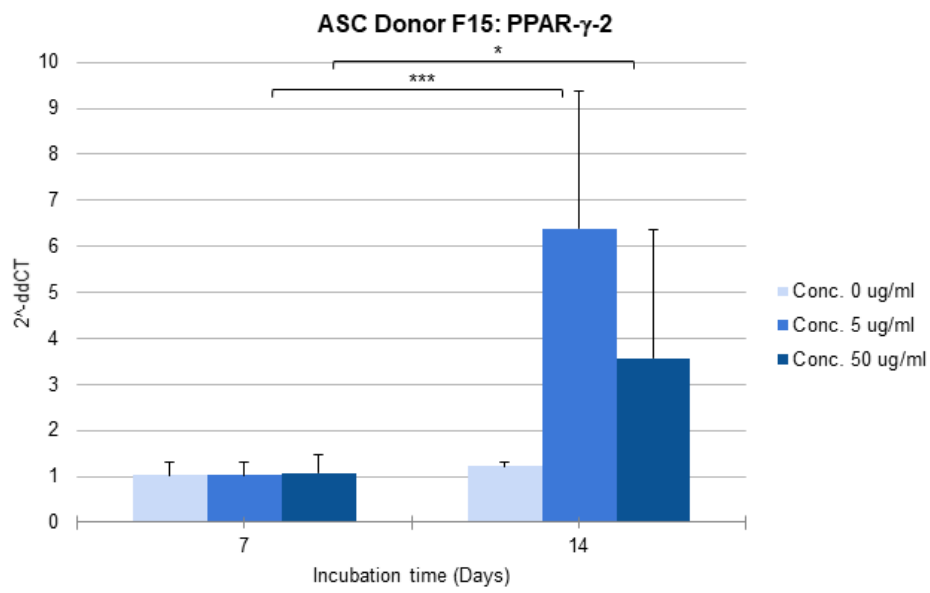

**Figure S3.** Average manifold induction of different genes for donor 3 (internal abbreviation F15). Experiments were carried out for three conditions and two time points, with 0, 5 or 50 ug/mL aCaP nanoparticles, denoted as Conc. = concentration and incubation for 7 or 14 days in culture, respectively.

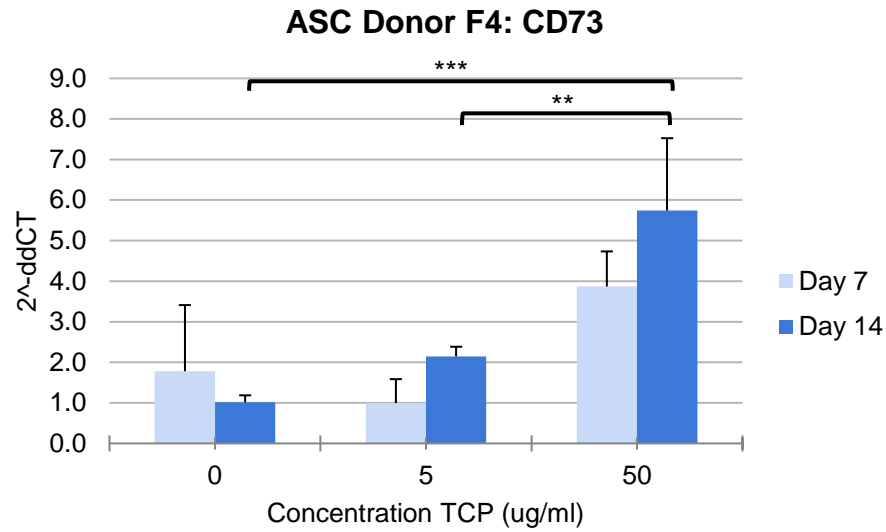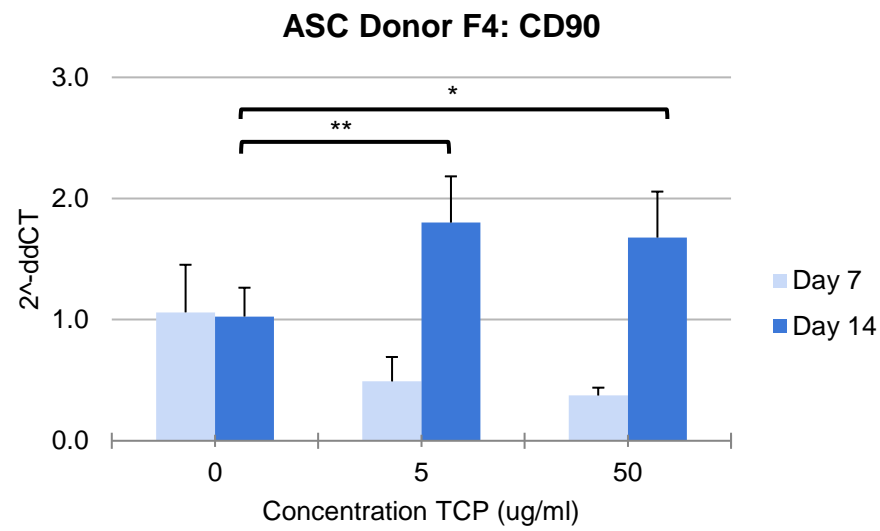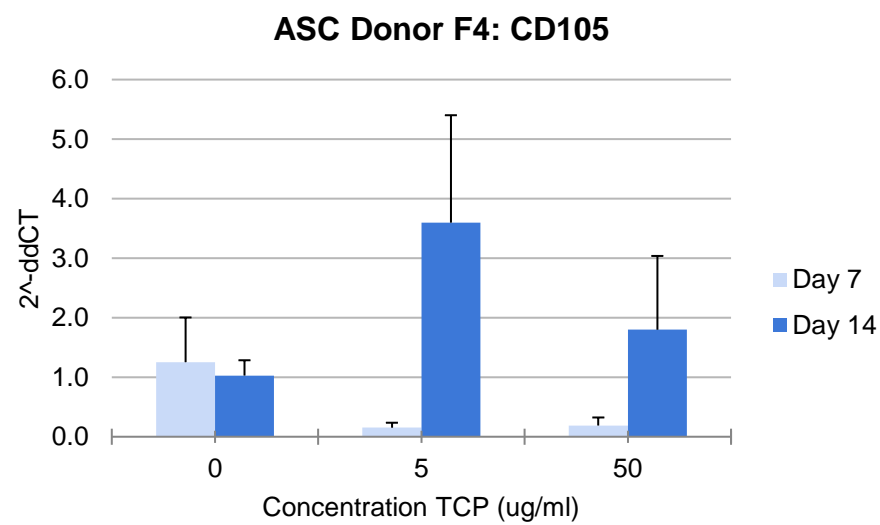

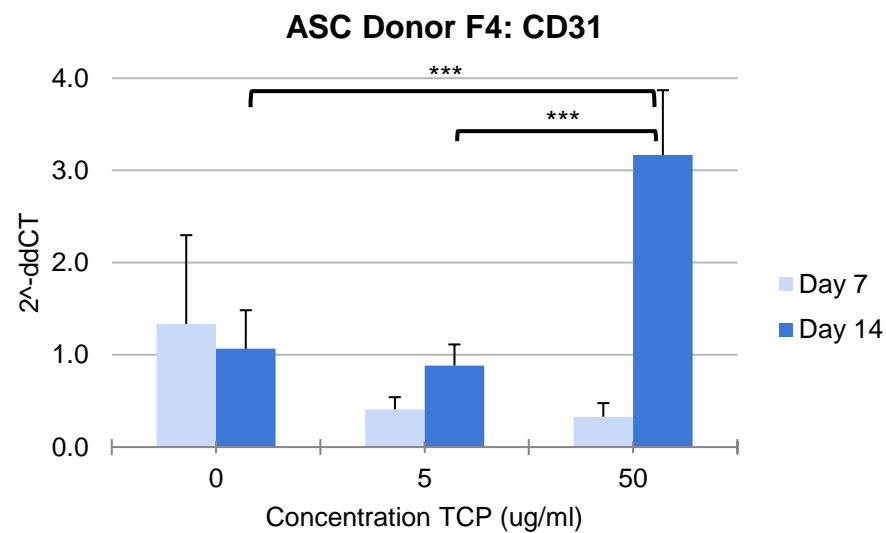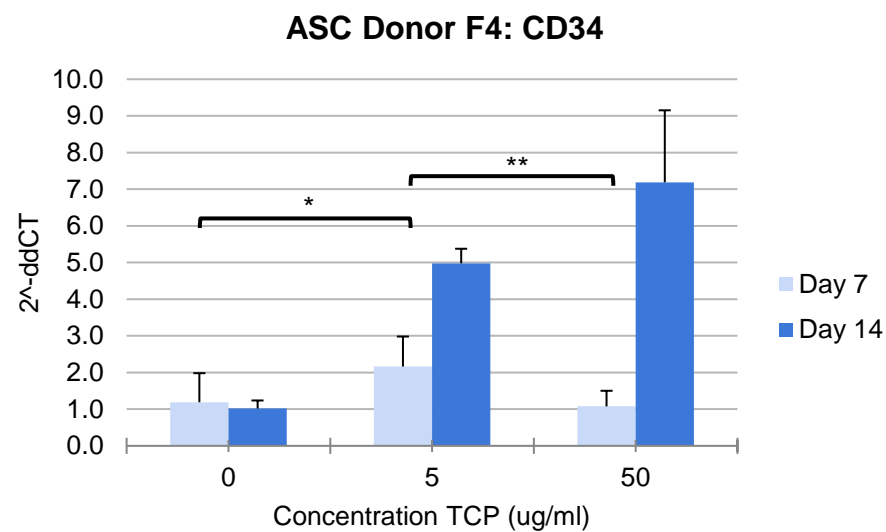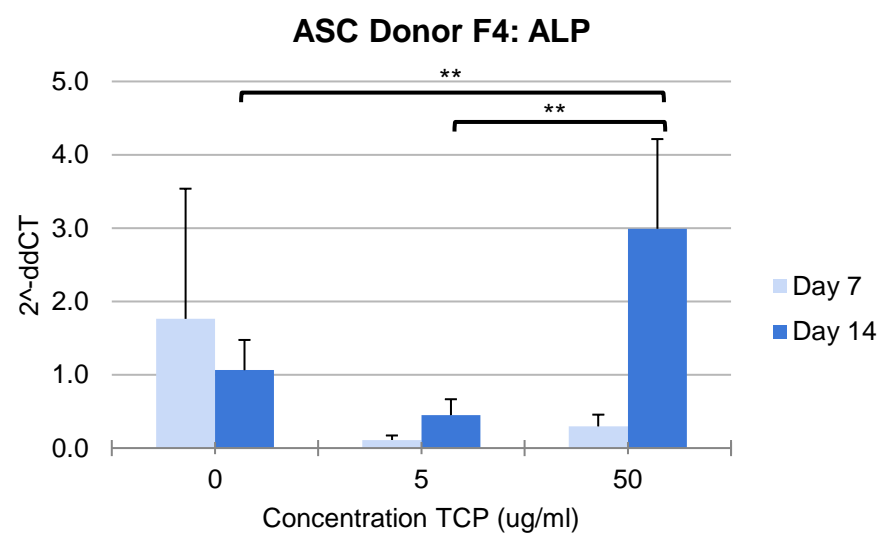



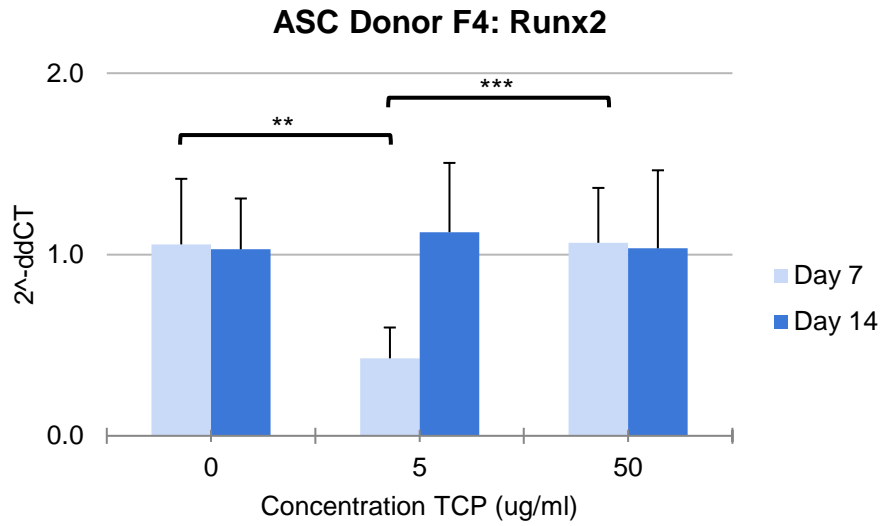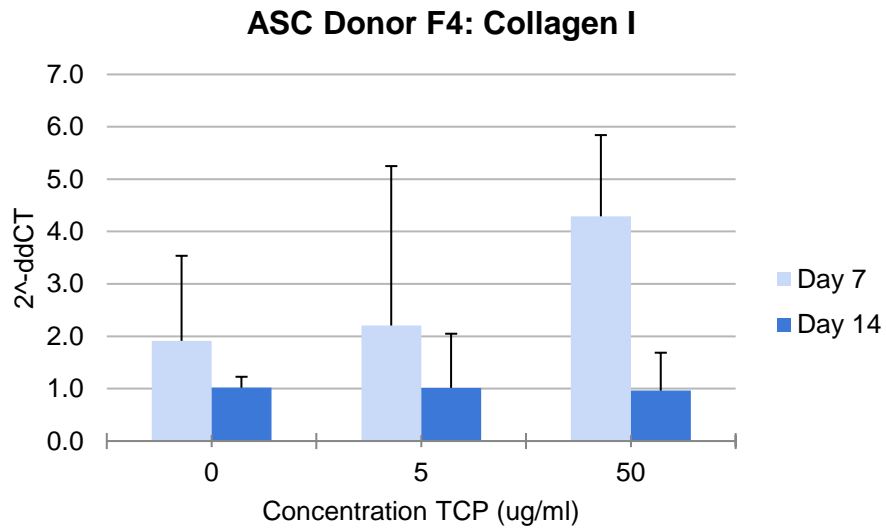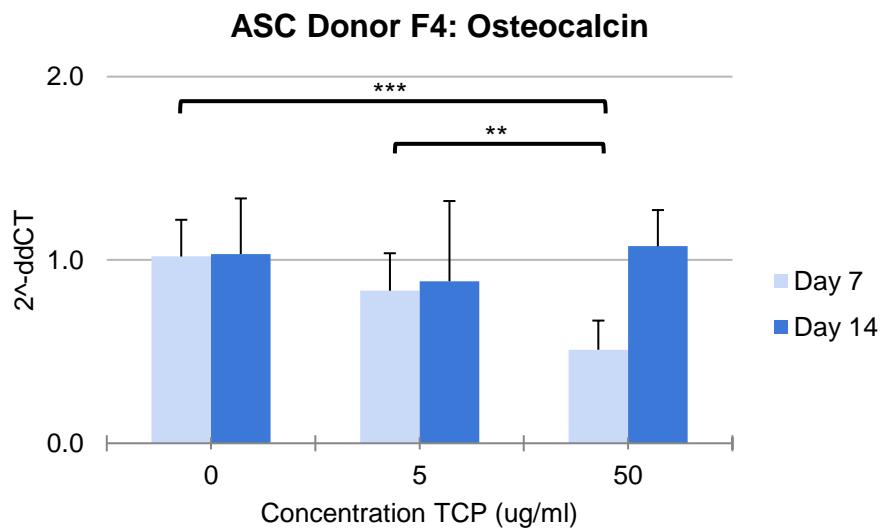

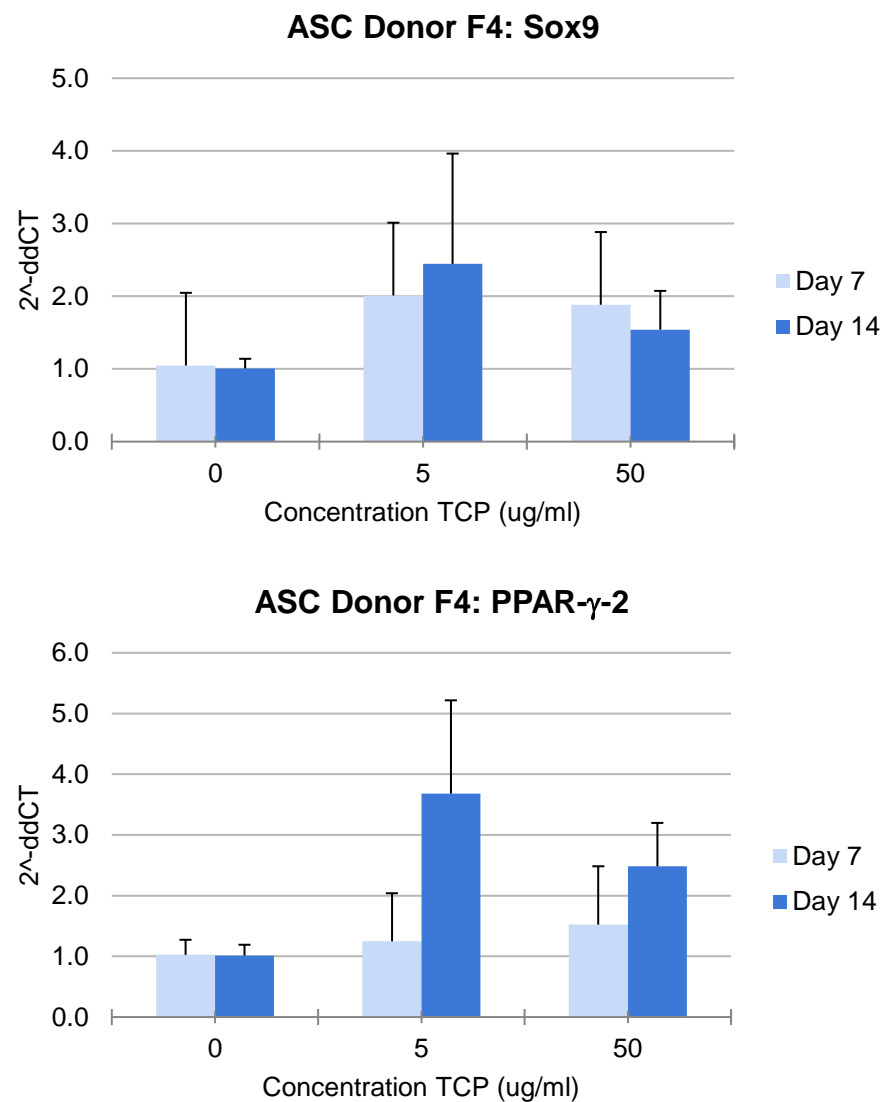

**Figure S4.** Average manifold induction of different genes for donor 1 (internal abbreviation F4). Experiments were carried out for three conditions and two time points, with 0, 5 or 50 ug/mL aCaP nanoparticles and at 7 or 14 days in culture, respectively. Key: TCP = amorphous calcium phosphate nanoparticles.

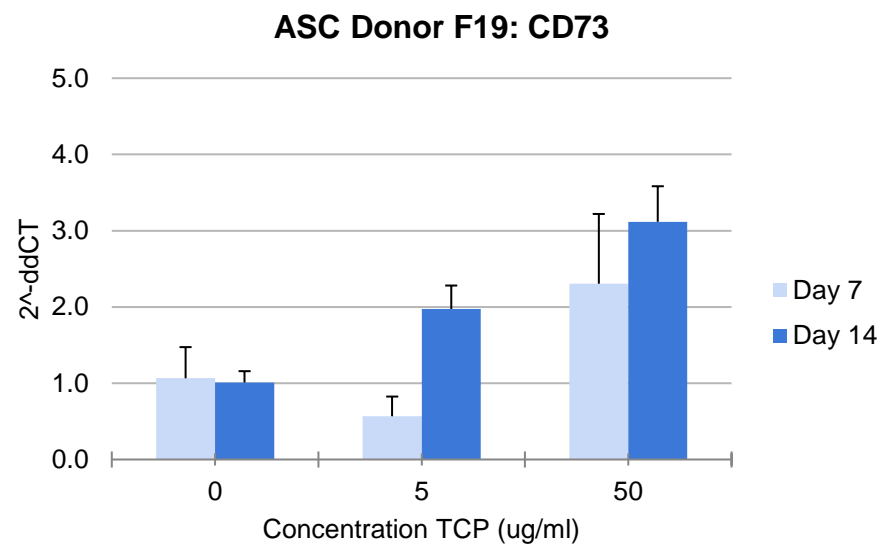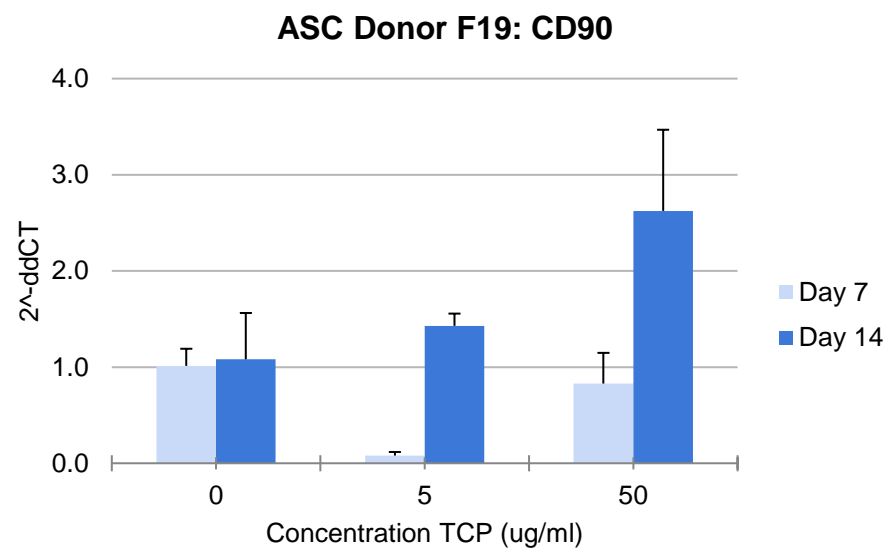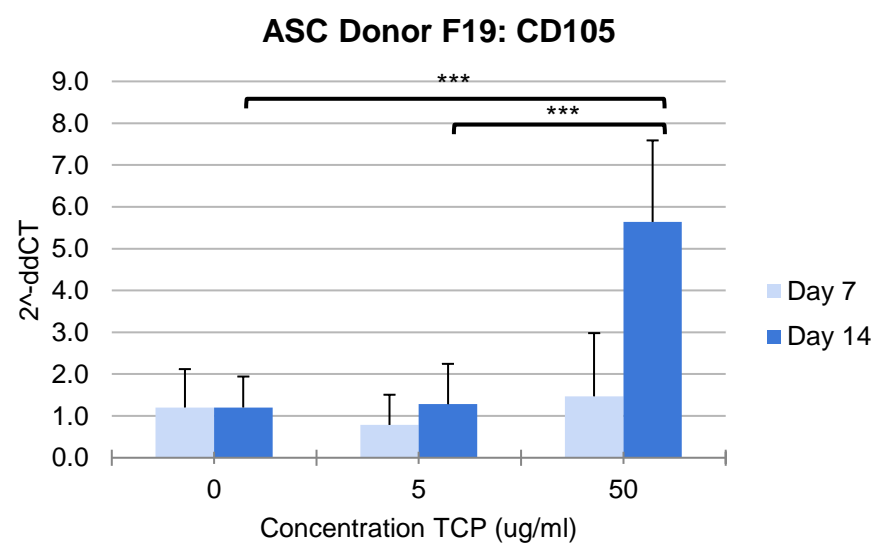

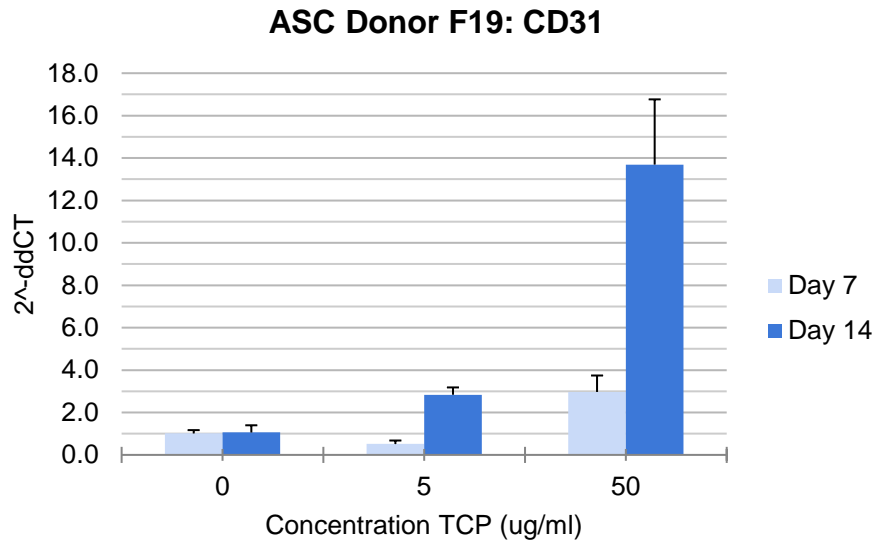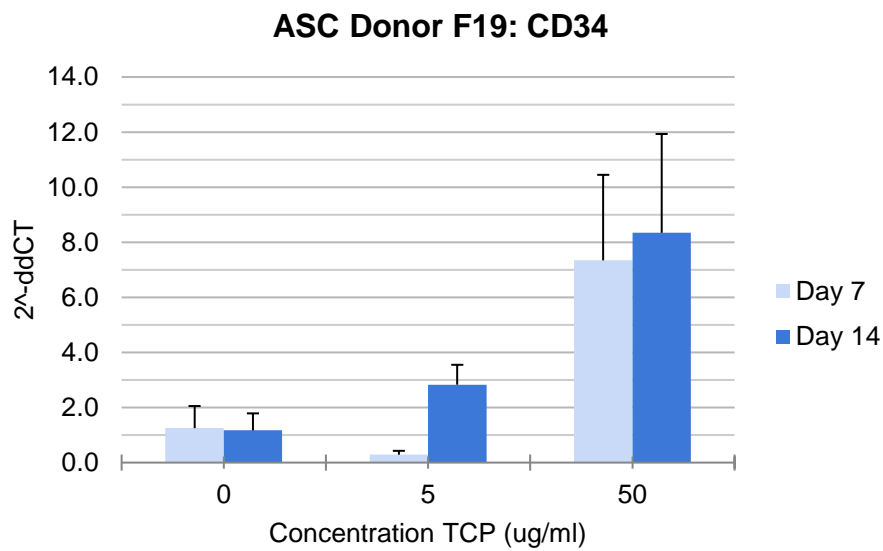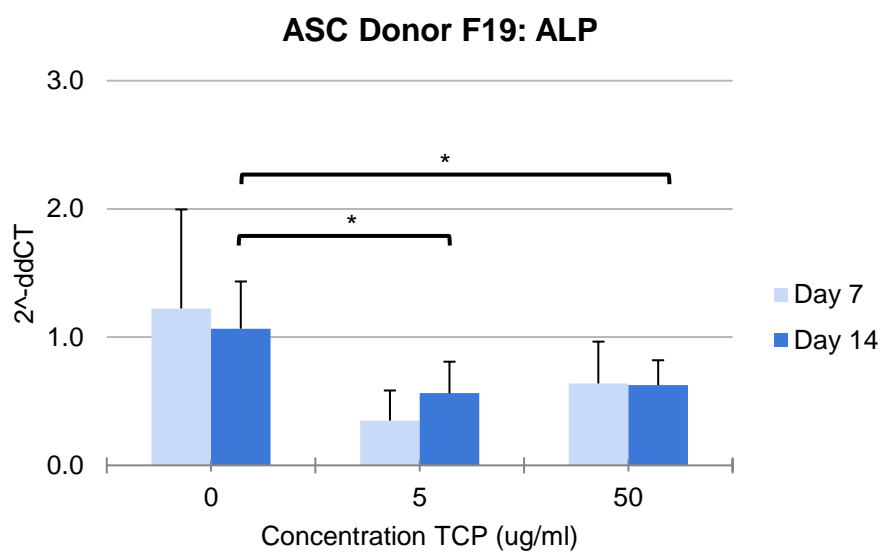

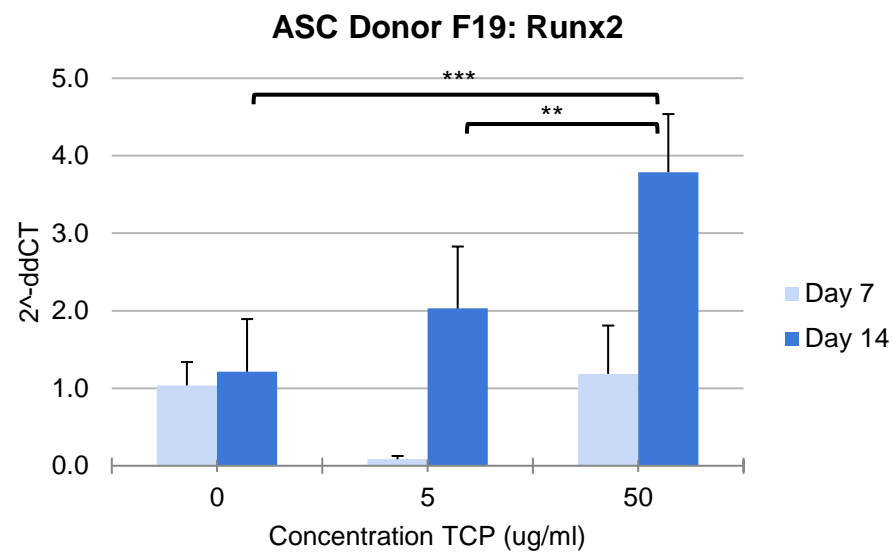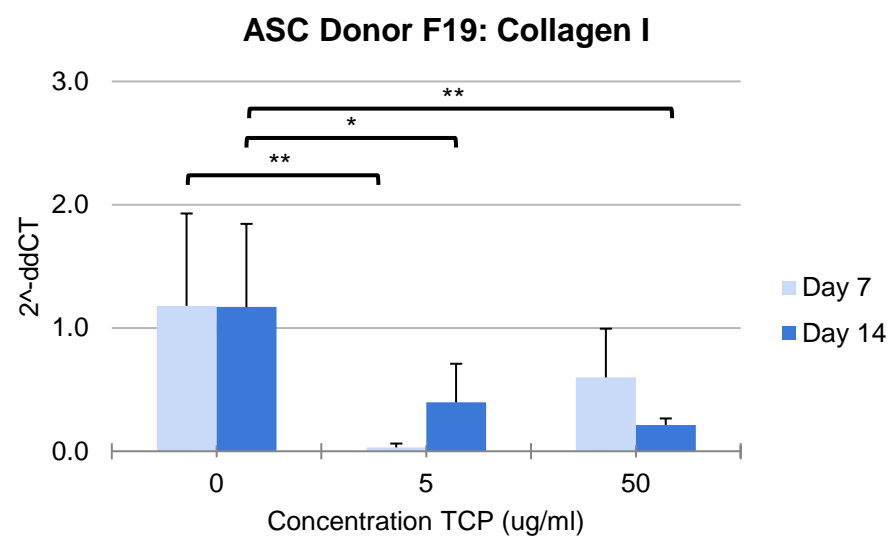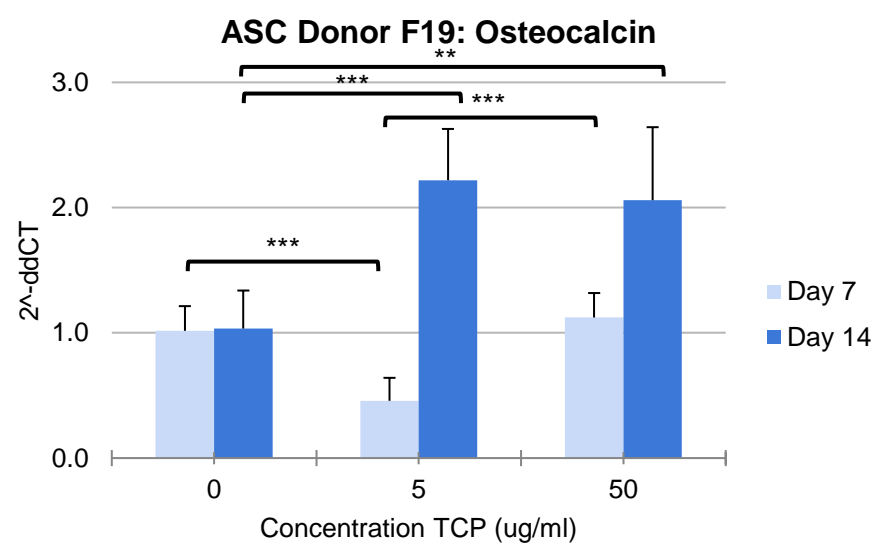

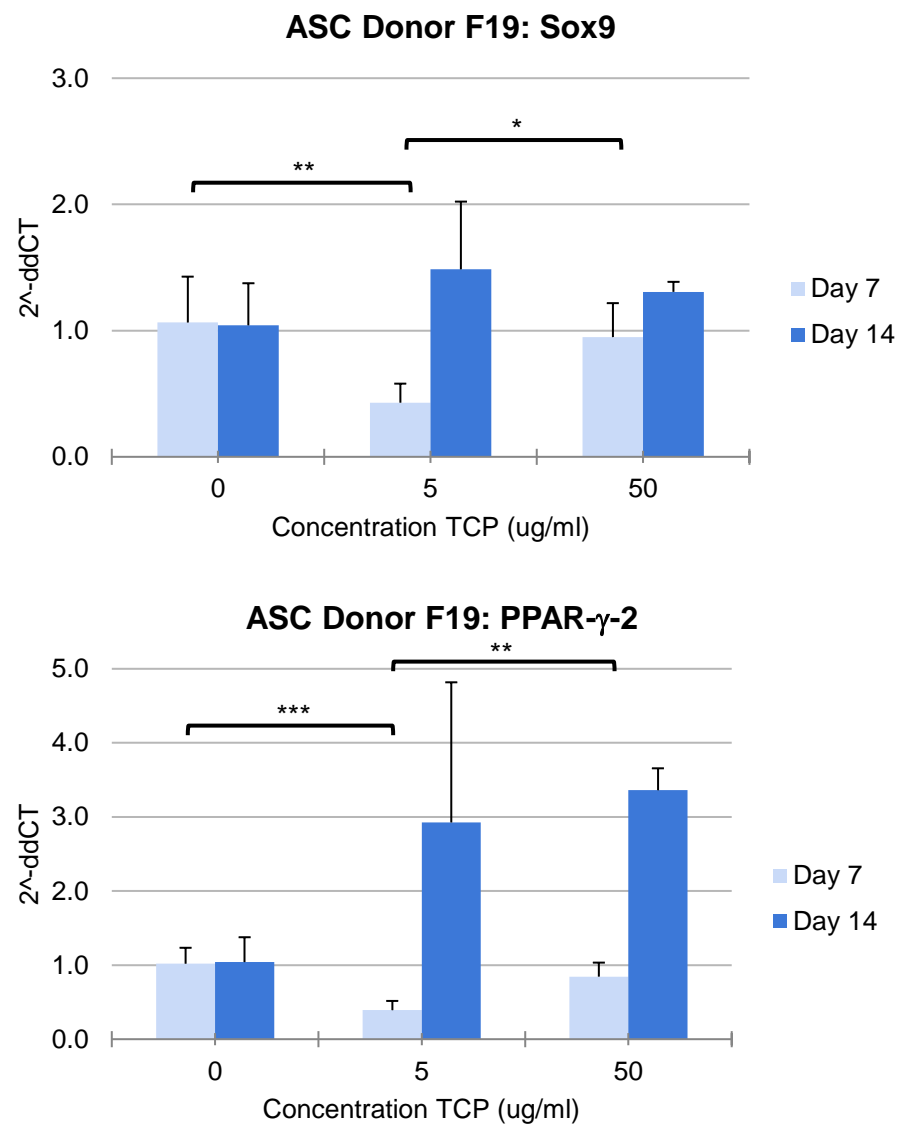

**Figure S5.** Average manifold induction of different genes for donor 2 (internal abbreviation F19). Experiments were carried out for three conditions and two time points, with 0, 5 or 50 ug/mL aCaP nanoparticles and at 7 or 14 days in culture, respectively. Key: TCP = amorphous calcium phosphate nanoparticles.

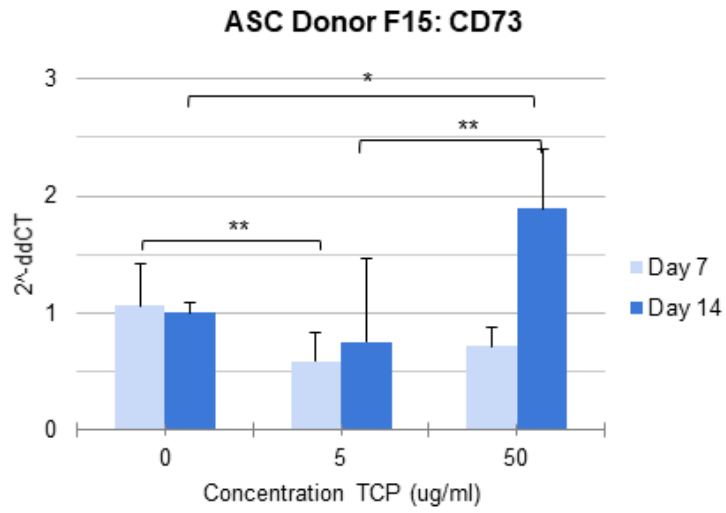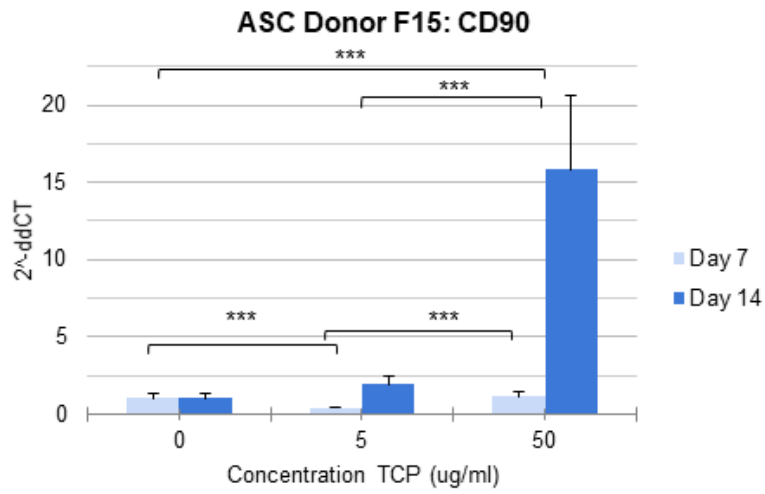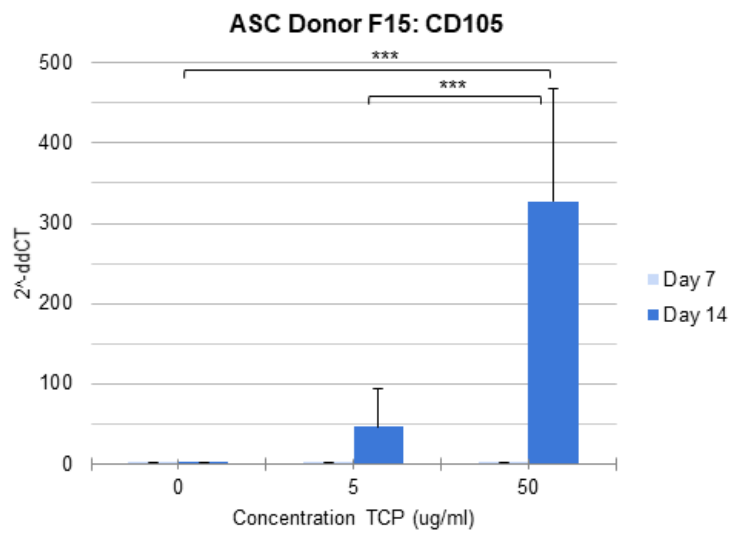

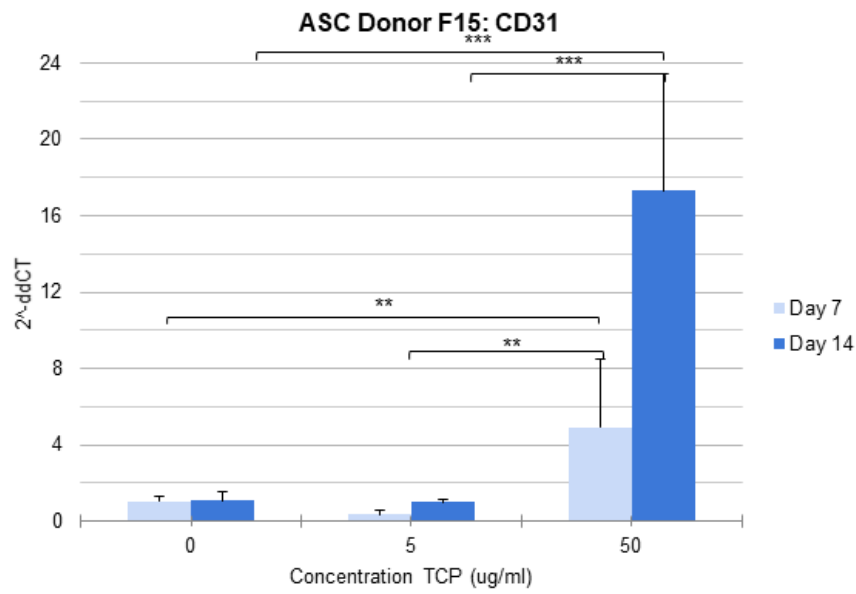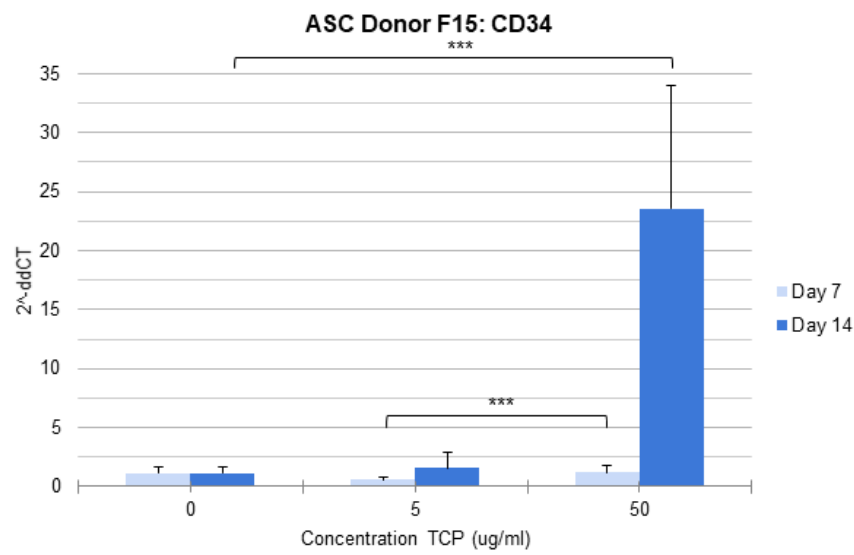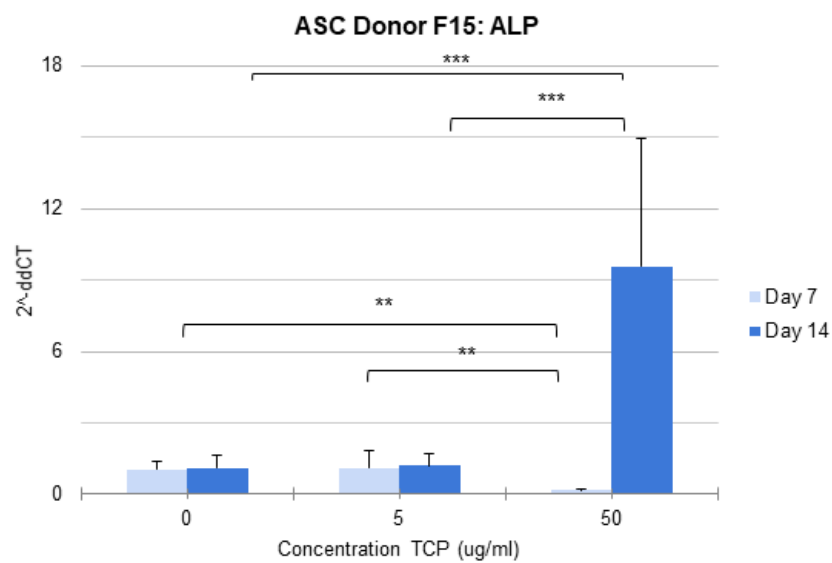



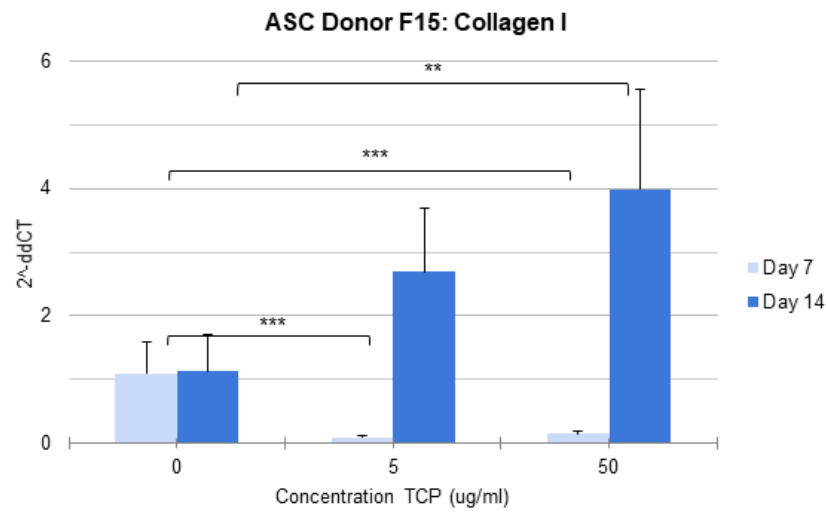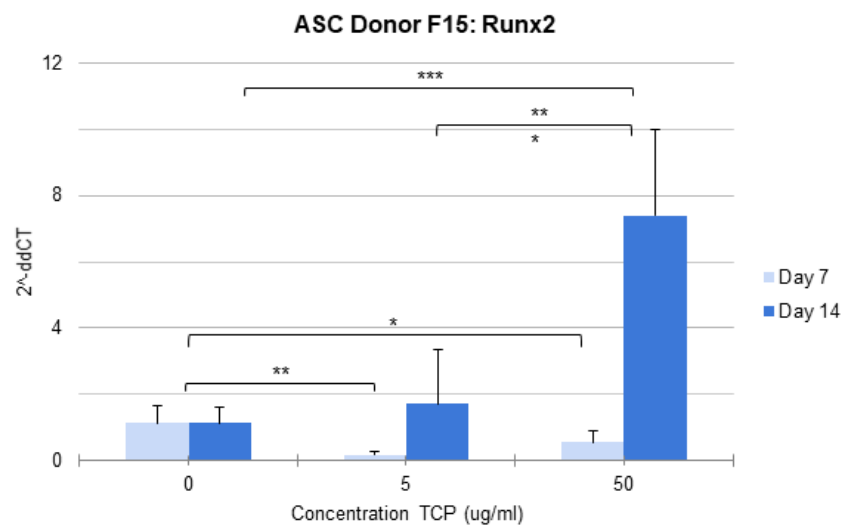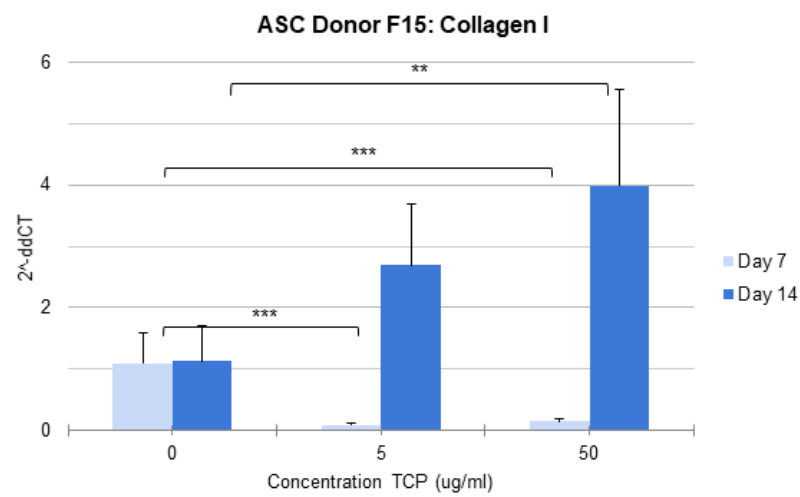

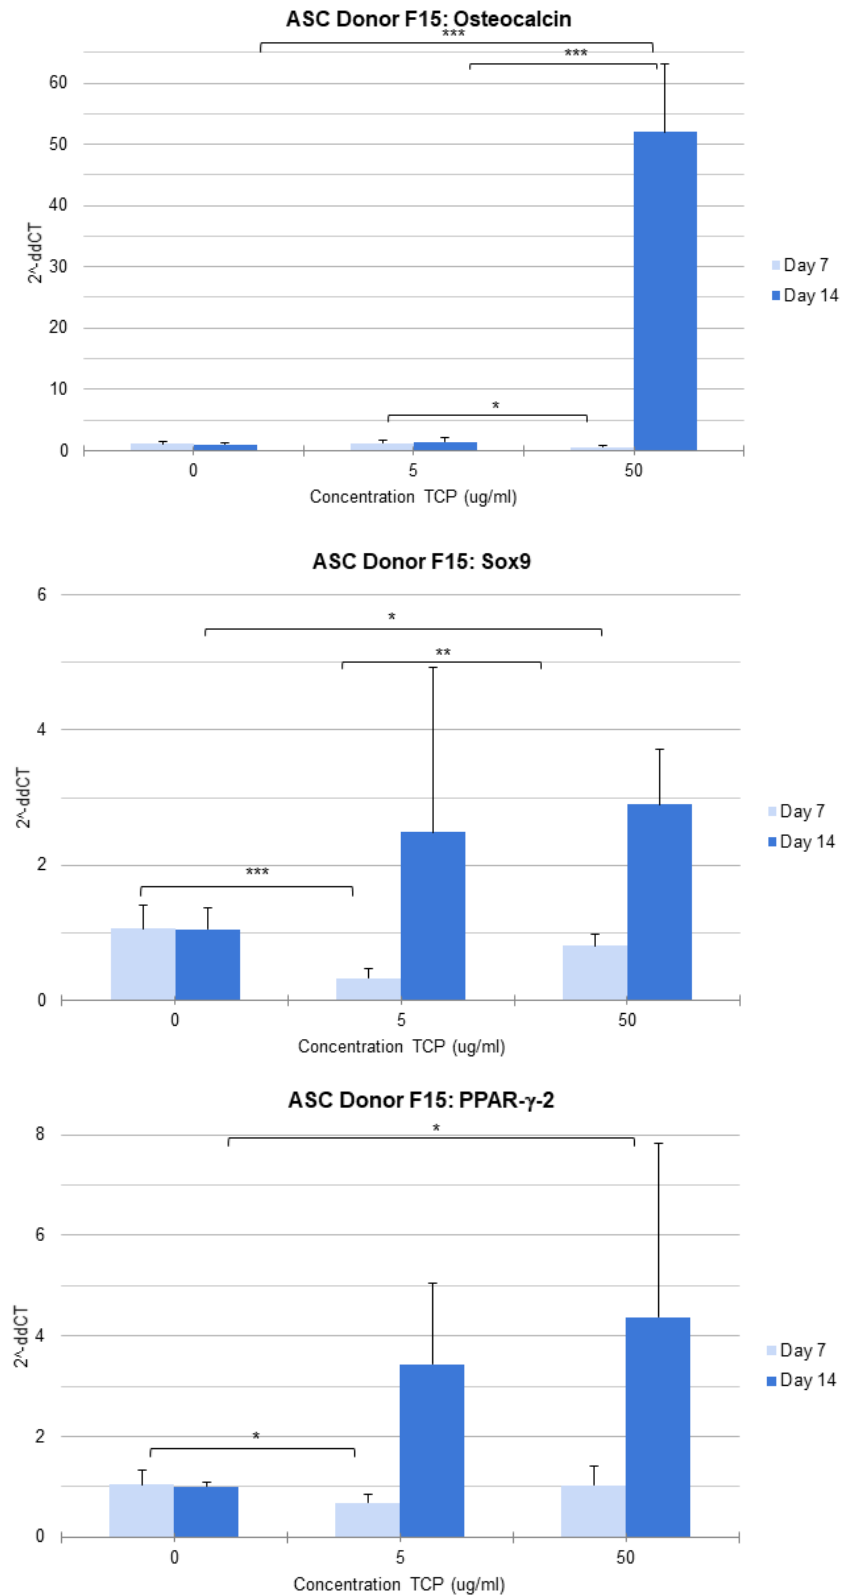

**Figure S6.** Average manifold induction of different genes for donor 3 (internal abbreviation F15). Experiments were carried out for three conditions and two time points, with 0, 5 or 50 ug/mL aCaP nanoparticles and at 7 or 14 days in culture, respectively. Key: TCP = amorphous calcium phosphate nanoparticles.

**Table S1.** The sequences of forward and reverse primers.

| Gene              |         | Sequence (5'-3')               |
|-------------------|---------|--------------------------------|
| GAPDH             | forward | ACC ACA GTC CAT GCC ATC AC     |
|                   | reverse | TCC ACC ACC CTG TTG CTG TA     |
| CD31              | forward | ATT GCA GTG GTT ATC ATC GGA    |
|                   | reverse | CTC GTT GTT GG AGT TCA GAA GTG |
| CD34              | forward | TGA AGC CTA GCC TGT CAC CT     |
|                   | reverse | CGC ACA GCT GGA GGT CTT AT     |
| CD73              | forward | CTC CTC TCA ATC ATG CCG CT     |
|                   | reverse | CCC AGG TAA TTG TGC CAT TGT    |
| CD90              | forward | TGA ATA CAG ACT GCA CCT CCC    |
|                   | reverse | CTT GAC GGG TGA GGC TAG GA     |
| CD105             | forward | CAG CAG TGT CTT CCT GCA TC     |
|                   | reverse | AGT TCC ACC TTC ACC GTC AC     |
| ALP               | forward | CTG GTA GTT GTT GTG AGC AT     |
|                   | reverse | CCC AAA GGC TTC TTC TTG        |
| Osteocalcin       | forward | CAC TCC TCG CCC TAT TGG C      |
|                   | reverse | CCC TCC TGC TTG GAC ACA AAG    |
| Runx2             | forward | GAA CCC AGA AGG CAC AGA CA     |
|                   | reverse | GGC TCA GGT AGG AGG GCT        |
| COL1              | forward | TGA CGA GAC CAA GAA CTG        |
|                   | reverse | CCA TCC AAA CCA CTG AAA CC     |
| PPAR- $\alpha$ -2 | forward | AGG AGC AGA GCA AAG AGG        |
|                   | reverse | CCT CGG ATA TGA GAA CCC        |
| Sox 9             | forward | CTC TGG AGA CTT CTG AAC GAG    |
|                   | reverse | GTT CTT CAC CGA CTT CCT CCG    |
